# Supplementary material for: Patient Violence towards Mental Health Nurses: A Concept Analysis
Source: Hindawi journal article supplement (doi:10.1155/2023/9496021), 2023-01-01
Supplement: f1 [file 9496021.f1.zip]

Archive with 2 entries (2 files):
- Appendix 1.docx
- Appendix 2.docx
