# Supplementary material for: Patient Violence towards Mental Health Nurses: A Concept Analysis
Source: Hindawi journal article supplement (doi:10.1155/2023/9496021), 2023-01-01
Supplement: f1 [file 9496021.f1.zip › Appendix 1.docx]

**Appedix 1.** List of selected studies

Abderhalden, C., Needham, I., Miserez, B., Almvik, R., Dassen, T., Haug, H. J., & Fischer, J. E.(2004). Predicting inpatient violence in acute psychiatric wards using the Brøset‐Violence‐Checklist: A multicentre prospective cohort study. *Journal of Psychiatric and Mental Health Nursing*, 11(4), 422-427. https://doi.org/ 10.1111/j.1365-2850.2004.00733.x

Alexander, J., & Bowers, L. (2004). Acute psychiatric ward rules: A review of the literature. *Journal of Psychiatric and Mental Health Nursing*, 11(5), 623-631. https://doi.org/ 10.1111/j.1365-2850.2004.00770.x

Alford-Jenkins, M. (2014). *Integrating a system approach to identify and manage aggressive behaviors in adult males with severe mental illness in a psychiatric hospital*. ProQuest LLC.

Amoo, G., & Fatoye, F. O. (2010). Aggressive behaviour and mental illness: A study of in-patients at Aro Neuropsychiatric Hospital, Abeokuta. *Nigerian Journal of Clinical Practice*, 13(3), 351-355.

Aquilina, C. (1991). Violence by psychiatric in-patients. *Medicine, Science and the Law*, 31(4), 306-312. https://doi.org/10.1177/002580249103100406

Arango, C., Barba, A. C., González-Salvador, T., & Ordonez, A. C. (1999). Violence in inpatients with schizophrenia: A prospective study. *Schizophrenia Bulletin*, 25(3), 493-503. https://doi.org/10.1093/oxfordjournals.schbul.a033396

Arbach-Lucioni, K., Andres-Pueyo, A., Pomarol-Clotet, E., & Gomar-Sones, J. (2011). Predicting violence in psychiatric inpatients: A prospective study with the HCR-20 violence risk assessment scheme. *Journal of Forensic Psychiatry & Psychology*, 22(2), 203-222. https://doi.org/10.1080/14789949.2010.530290

Baby, M., Glue, P., & Carlyle, D. (2014). ‘Violence is not part of our job’: A thematic analysis of psychiatric mental health nurses’ experiences of patient assaults from a New Zealand perspective. *Issues in Mental Health Nursing*, 35(9), 647-655. https://doi.org/ 10.3109/01612840.2014.892552

Beauford, J. E., McNiel, D. E., & Binder, R. L. (1997). Utility of the initial therapeutic alliance in evaluating psychiatric patients' risk of violence. *American Journal of Psychiatry*, 154(9), 1272-1276. http://doi.org/10.1176/ajp.154.9.1272

Bekelepi, N., Martin, P. D., & Chipps, J. (2015). Professional nurses' knowledge and skills in the management of aggressive patients in a psychiatric hospital in the Western Cape. *Africa Journal of Nursing and Midwifery*, 17(sup-1), 151-164.

Bimenyimana, E., Poggenpoel, M., Myburgh, C., & Van Niekerk, V. (2009). The lived experience by psychiatric nurses of aggression and violence from patients in a Gauteng psychiatric institution. *Curationis*, 32(3), 4-13.

Björkdahl, A., Olsson, D., & Palmstierna, T. (2006). Nurses’ short-term prediction of violence in acute psychiatric intensive care. *Acta Psychiatrica Scandinavica*, 113(3), 224-229. https://doi.org/10.1111/j.1600-0447.2005.00679.x

Bonner, G. P. (2012). *Touched by violence and caring for the violator: The lived experiences of nurses who were assaulted by their patients in psychiatric settings.* Doctoral dissertation. Capella University.

Bowers, L., Allan, T., Simpson, A., Jones, J., Van Der Merwe, M., & Jeffery, D. (2009). Identifying key factors associated with aggression on acute inpatient psychiatric wards. *Issues in Mental Health Nursing*, 30(4), 260-271. https://doi.org/10.1080/01612840802710829

Camuccio, C. A., Chambers, M., Välimäki, M., Farro, D., & Zanotti, R. (2012). Managing distressed and disturbed patients: The thoughts and feelings experienced by Italian nurses. *Journal of Psychiatric and Mental Health Nursing*, 19(9), 807-815. https://doi.org/10.1111/j.1365-2850.2011.01857.x

Chen, S. C., Hwu, H. G., & Williams, R. A. (2005). Psychiatric nurses' anxiety and cognition in managing psychiatric patients' aggression. *Archives of Psychiatric Nursing*, 19(3), 141-149. https://doi.org/10.1016/j.apnu.2005.04.006

Chen, W. C., Hwu, H. G., & Wang, J. D. (2009a). Hospital staff responses to workplace violence in a psychiatric hospital in Taiwan. *International Journal of Occupational and Environmental Health*, 15(2), 173-179. https://doi.org/10.1179/oeh.2009.15.2.173

Chen, W. C., Sun, Y. H., Lan, T. H., & Chiu, H. J. (2009b). Incidence and risk factors of workplace violence on nursing staffs caring for chronic psychiatric patients in Taiwan. *International Journal of Environmental Research and Public Health*, 6(11), 2812-2821. https://doi.org/10.3390/ijerph6112812

Chen, W. C., Wang, J. D., Lew-Ting, C. Y., Chiu, H. J., & Lin, Y. P. (2007). Workplace violence on workers caring for long-term institutionalized schizophrenic patients in Taiwan. *Journal of Occupational Health*, 49(4), 311-316. https://doi.org/10.1539/joh.49.311

Chou, K. R., Lu, R. B., & Mao, W. C. (2002). Factors relevant to patient assaultive behavior and assault in acute inpatient psychiatric units in Taiwan. *Archives of Psychiatric Nursing*, 16(4), 187-195. https://doi.org/10.1053/apnu.2002.34394

Clarke, D. E., Brown, A. M., & Griffith, P. (2010). The Brøset Violence Checklist: Clinical utility in a secure psychiatric intensive care setting. *Journal of Psychiatric and Mental Health Nursing*, 17(7), 614-620. https://doi.org/10.1111/j.1365-2850.2010.01558.x

Cookson, A., Daffern, M., & Foley, F. (2012). Relationship between aggression, interpersonal style, and therapeutic alliance during short‐term psychiatric hospitalization. *International Journal of Mental Health Nursing*, 21(1), 20-29. https://doi.org/10.1111/j.1447-0349.2011.00764.x

Currid, T. (2009). Experiences of stress among nurses in acute mental health settings. *Nursing Standard*, 23(44), 40-46. https://doi.org/10.7748/ns2009.07.23.44.40.c7108

Cutcliffe, J. R. (1999). Qualified nurses' lived experience of violence perpetrated by individuals suffering from enduring mental health problems: A hermeneutic study. *International Journal of Nursing Studies*, 36(2), 105-116.

Cutcliffe, J. R., & Riahi, S. (2013). Systemic perspective of violence and aggression in mental health care: Towards a more comprehensive understanding and conceptualization: Part 2. *International Journal of Mental Health Nursing*, 22(6), 568-578. https://doi.org/10.1111/inm.12028

d'Ettorre, G., & Pellicani, V. (2017). Workplace violence toward mental healthcare workers employed in psychiatric wards. *Safety and Health at Work*, 8(4), 337-342. https://doi.org/10.1016/j.shaw.2017.01.004

de Bles, N. J., Hazewinkel, A. W., Bogers, J. P., van den Hout, W. B., Mouton, C., van Hemert, A. M., Ottenheim, N. R., & Giltay, E. J. (2020). The incidence and economic impact of aggression in closed long-stay psychiatric wards. *International Journal of Psychiatry in Clinical Practice,* 25(4), 430-436.https://doi.org/10.1080/13651501.2020.1821894.

Dong, G. W. (2020). *Effects of Psychiatric Nurses’ Violent Experience on Work Happiness: Moderating Effect of Self Soothing Ability*. Master’s thesis. Inje University

Drori, T., Guetta, H., Ben Natan, M., & Polakevich, Y. (2017). Patient violence toward psychiatric health care workers in Israel as viewed through incident reports: A retrospective study. *Journal of the American Psychiatric Nurses Association*, 23(2), 143-148. https://doi.org/10.1177/1078390316687372

Dumais, A., Larue, C., Michaud, C., & Goulet, M. H. (2012). Predictive validity and psychiatric nursing staff's perception of the clinical usefulness of the French version of the dynamic appraisal of situational aggression. *Issues in Mental Health Nursing*, 33(10), 670-675. https://doi.org/10.3109/01612840.2012.697254

Duxbury, J. (1999). An exploratory account of registered nurses' experience of patient aggression in both mental health and general nursing settings. *Journal of Psychiatric and Mental Health Nursing*, 6(2), 107-114. https://doi.org/10.1046/j.1365-2850.1999.620107.x

Duxbury, J. (2002). An evaluation of staff and patient views of and strategies employed to manage inpatient aggression and violence on one mental health unit: A pluralistic design. *Journal of Psychiatric and Mental Health Nursing*, 9(3), 325-337. https://doi.org/10.1046/j.1365-2850.2002.00497.x

Duxbury, J., & Whittington, R. (2005). Causes and management of patient aggression and violence: Staff and patient perspectives. *Journal of Advanced Nursing*, 50(5), 469-478. https://doi.org/10.1111/j.1365-2648.2005.03426.x

Ezeobele, I. E., McBride, R., Engstrom, A., & Lane, S. D. (2019). Aggression in acute inpatient psychiatric care: A survey of staff attitudes. *Canadian Journal of Nursing Research*, 51(3), 145-153. https://doi.org/10.1177/0844562118823591

Finnema, E. J., Dassen, T., & Halfens, R. (1994). Aggression in psychiatry: A qualitative study focusing on the characterization and perception of patient aggression by nurses working on psychiatric wards. *Journal of Advanced Nursing*, 19(6), 1088-1095. https://doi.org/10.1111/j.1365-2648.1994.tb01192.x

Foster, C., Bowers, L., & Nijman, H. (2007). Aggressive behaviour on acute psychiatric wards: Prevalence, severity and management. *Journal of Advanced Nursing*, 58(2), 140-149. https://doi.org/10.1111/j.1365-2648.2007.04169.x

Giarelli, E., Nocera, R., Jobes, M., Boylan, C., Lopez, J., & Knerr, J. (2018). Exploration of aggression/violence among adult patients admitted for short-term, acute-care mental health services. *Archives of Psychiatric Nursing*, 32(2), 215-223. https://doi.org/10.1016/j.apnu.2017.11.004

Griffith, J. J., Daffern, M., & Godber, T. (2013). Examination of the predictive validity of the Dynamic Appraisal of Situational Aggression in two mental health units. *International Journal of Mental Health Nursing*, 22(6), 485-492. https://doi.org/10.1111/inm.12011

Ha, M. (2020). *Influence of Psychiatric Nurses' Violence Experience and Burnout on Turnover Intention.* Master's thesis. Dong-Eui University

Hage, S., van Meijel, B., Fluttert, F., & Berden, G. F. M. G. (2009). Aggressive behaviour in adolescent psychiatric settings: What are risk factors, possible interventions and implications for nursing practice? A literature review. *Journal of Psychiatric and Mental Health Nursing*, 16(7), 661-669. https://doi.org/10.1111/j.1365-2850.2009.01454.x

Haim, R., Rabinowitz, J., Lereya, J., & Fennig, S. (2002). Predictions made by psychiatrists and psychiatric nurses of violence by patients. *Psychiatric Services*, 53(5), 622-624. https://doi.org/10.1176/appi.ps.53.5.622

Haller, R. M., & Deluty, R. H. (1988). Assaults on staff by psychiatric in-patients: A critical review. *The British Journal of Psychiatry*, 152(2), 174-179. https://doi.org/10.1192/bjp.152.2.174

Hamrin, V., Iennaco, J., & Olsen, D. (2009). A review of ecological factors affecting inpatient psychiatric unit violence: Implications for relational and unit cultural improvements. *Issues in Mental Health Nursing*, 30(4), 214-226. https://doi.org/10.1080/01612840802701083

Hansen, B. (1996). Workplace violence in the hospital psychiatric setting: An occupational health perspective. *AAOHN Journal*, 44(12), 575-580.

Higgins, A., Barker, P., & Begley, C. M. (2009). Clients with mental health problems who sexualize the nurse‐client encounter: The nursing discourse. *Journal of Advanced Nursing*, 65(3), 616-624. https://doi.org/10.1111/j.1365-2648.2008.04899.x

Isaiah, O. O., Lawal, A. B., Oluseyi, A. O., Ejidokun Adeolu, R. N., & Oriola, O. O. (2019). Experience and attitude of psychiatric nurses toward inpatient aggression in a nigerian psychiatric hospital. *International Journal of Caring Sciences*, 12(3), 1547-1560.

Iverson, G. L., & Hughes, R. (2000). Monitoring aggression and problem behaviors in inpatient neuropsychiatric units. *Psychiatric Services*, 51(8), 1040-1042. https://doi.org/10.1176/appi.ps.51.8.1040

Jalil, R., Huber, J. W., Sixsmith, J., & Dickens, G. L. (2017). Mental health nurses’ emotions, exposure to patient aggression, attitudes to and use of coercive measures: Cross sectional questionnaire survey. *International Journal of Nursing Studies*, 75, 130-138. https://doi.org/10.1016/j.ijnurstu.2017.07.018

James, D. V., Fineberg, N. A., Shah, A. K., & Priest, R. G. (1990). An increase in violence on an acute psychiatric ward: A study of associated factors. *British Journal of Psychiatry*, 156(6), 846-852. https://doi.org/10.1192/bjp.156.6.846

Jang, S. J. (2004). *Relationship between Experience of Patients’ Violent Behaviors and Burnout of Psychiatric Nurses*. Master’s thesis. Seoul National University.

Johnson, M. E. (2004). Violence on inpatient psychiatric units: State of the science. *Journal of the American Psychiatric Nurses Association*, 10(3), 113-121. https://doi.org/10.1177/1078390304264959

Jonker, E. J., Goossens, P. J. J., Steenhuis, I. H. M., & Oud, N. E. (2008). Patient aggression in clinical psychiatry: Perceptions of mental health nurses. *Journal of Psychiatric and Mental Health Nursing*, 15(6), 492-499. https://doi.org/10.1111/j.1365-2850.2008.01261.x

Jung, H. S. (2005). *Psychiatric nurses' live experience of violence*. Unpublished master's thesis. Kongju National University.

Kim, J. H. (2019a). The moderating effect of social support on the relationship between violence experiences and violence responses of psychiatric nurses. *Journal of Korean Academy of Psychiatric and Mental Health Nursing,* 28(2), 144-155.

Kim, J. H. (2019b). The influence of violent experiences and positive psychological capital on burnout of psychiatric ward nurses. *The Korean Journal of Health Service Management,* 13(3), 67-80.

Koen, L., Lategan, B. H., Jordaan, E., Niehaus, D. J. H., & Emsley, R. A. (2004). Management of violent behaviour in acutely relapsed schizophrenics. *Curationis*, 27(4), 73-80. https://doi.org/10.4102/curationis.v27i4.1025

Koukia, E., & Zyga, S. (2013). Critical cases faced by mental health nurses and assistant nurses in psychiatric hospitals in Greece. *International Journal of Caring Sciences*, 6(3), 465-471.

Langsrud, K., Linaker, O. M., & Morken, G. (2007). Staff injuries after patient–staff incidences in psychiatric acute wards. *Nordic Journal of Psychiatry*, 61(2), 121-125. https://doi.org/10.1080/08039480701226104

LePage, J. P., McGhee, M., Aboraya, A., Murphy, J., VanHorn, L., Pollard, S., & Dean, P. (2005). Evaluating risk factors for violence at the inpatient unit level: Combining young adult patients and those with mental retardation. *Applied Nursing Research*, 18(2), 117-121. https://doi.org/10.1016/j.apnr.2004.07.004

Lim, E., Wynaden, D., & Heslop, K. (2019). Changing practice using recovery-focused care in acute mental health settings to reduce aggression: A qualitative study. *International Journal of Mental Health Nursing*, 28(1), 237-246. https://doi.org/10.1111/inm.12524

Llor-Esteban, B., Sánchez-Muñoz, M., Ruiz-Hernández, J. A., & Jiménez-Barbero, J. A. (2017). User violence towards nursing professionals in mental health services and emergency units. *The European Journal of Psychology Applied to Legal Context*, 9(1), 33-40. https://doi.org/10.1016/j.ejpal.2016.06.002

Lynch, D. M., & Noel, H. C. (2010). Integrating DSM-IV factors to predict violence in high‐risk psychiatric patients. *Journal of Forensic Sciences*, 55(1), 121-128. https://doi.org/10.1111/j.1556-4029.2009.01197.x

Maneeton, N., Maneeton, B., Jaiyen, N., Woottiluk, P., & Khemawichanurat, W. (2019). Prevalence of aggressive or violent behaviour in Thai patients with schizophrenia: A cross-sectional study. *East Asian Archives of Psychiatry*, 29(3), 87-90. https://doi.org/10.12809/eaap1775

Margari, F., Matarazzo, R., Casacchia, M., Roncone, R., Dieci, M., Safran, S., Fiori, G., & Simoni, L. (2005). Italian validation of MOAS and NOSIE: A useful package for psychiatric assessment and monitoring of aggressive behaviours. *International Journal of Methods in Psychiatric Research*, 14(2), 109-118. https://doi.org/10.1002/mpr.22

Moghadam, M. F., Pazargadi, M., & Khoshknab, M. F. (2013). Iranian nurses’ experiences of aggression in psychiatric wards: A qualitative study. *Issues in Mental Health Nursing*, 34(10), 765-771. https://doi.org/10.3109/01612840.2012.737893

Morrison, E. F. (1989). Theoretical modeling to predict violence in hospitalized psychiatric patients. *Research in Nursing & Health*, 12(1), 31-40. https://doi.org/10.1002/nur.4770120106

Morrison, E. F. (1993a). The measurement of aggression and violence in hospitalized psychiatric patients. *International Journal of Nursing Studies*, 30(1), 51-64. https://doi.org/10.1016/0020-7489(93)90092-9

Morrison, E. F. (1993b). Toward a better understanding of violence in psychiatric settings: Debunking the myths. *Archives of Psychiatric Nursing*, 7(6), 328-335. https://doi.org/10.1016/0883-9417(93)90050-7

Moursel, G., Çetinkaya Duman, Z., & Almvik, R. (2019). Assessing the risk of violence in a psychiatric clinic: The Brøset Violence Checklist (BVC) Turkish version—validity and reliability study. *Perspectives in Psychiatric Care*, 55(2), 225-232. https://doi.org/10.1111/ppc.12338

Moylan, L. B., Cullinan, M. B., & Kimpel, J. E. (2014). Differences in male and female nurses’ responses to physical assault by psychiatric patients: A supplemental finding of a mixed-methods study. *Journal of Psychosocial Nursing and Mental Health Services*, 52(12), 36-42. https://doi.org/10.3928/02793695-20140903-01

Owen, C., Tarantello, C., Jones, M., & Tennant, C. (1998). Violence and aggression in psychiatric units. *Psychiatric Services*, 49(11), 1452-1457. https://doi.org/10.1176/ps.49.11.1452

Oyelade, O. O., & Ayandiran, E. O. (2018). Violence management in a Nigerian psychiatric facility: psychiatric–mental health nurses' current practices and their effectiveness. *Journal of Psychosocial Nursing and Mental Health Services*, 56(11), 37-45. https://doi.org/10.3928/02793695-20180503-02

Pekurinen, V., Willman, L., Virtanen, M., Kivimäki, M., Vahtera, J., & Välimäki, M. (2017). Patient aggression and the wellbeing of nurses: A cross-sectional survey study in psychiatric and non-psychiatric settings. *International Journal of Environmental Research and Public Health*, 14(10), 1245. https://doi.org/10.3390/ijerph14101245

Penningroth, P. E. (1975). Control of violence in a mental health setting. *The American Journal of Nursing*, 75*(4)***,** 606-609. https://doi.org/10.2307/3423349

Pulsford, D., Crumpton, A., Baker, A., Wilkins, T., Wright, K., & Duxbury, J. (2013). Aggression in a high secure hospital: Staff and patient attitudes. *Journal of Psychiatric and Mental Health Nursing*, 20(4), 296-304. https://doi.org/10.1111/j.1365-2850.2012.01908.x

Ruiz-Hernández, J. A., Sánchez-Muñoz, M., Jiménez-Barbero, J. A., López, D. P., Galían-Muñoz, I., Llor-Esteban, B., & Llor-Zaragoza, L.­ (2019). User violence in mental health services: Adaptation of an instrument. Healthcare-workers’ Aggressive Behavior Scale-Users-Mental Health Version (HABS-U-MH). *PloS one,* 14(3), e0212742. https://doi.org/10.1371/journal.pone.0212742

Salerno, S., Dimitri, L., & Talamanca, I. F. (2009). Occupational risk due to violence in a psychiatric ward. *Journal of Occupational Health,* 51**,** 349-354. https://doi.org/10.1539/joh.l8145

Salzmann-Erikson, M., & Yifter, L. (2020). Risk factors and triggers that may result in patient-initiated violence on inpatient psychiatric units: an integrative review. *Clinical Nursing Research,* 29(7), 504-520. https://doi.org/10.1177/1054773818823333

Sarver, W. L., Radziewicz, R., Coyne, G., Colon, K., & Mantz, L. (2019). Implementation of the Brøset Violence Checklist on an acute psychiatric unit. *Journal of the American Psychiatric Nurses Association*, 25(6), 476-486. https://doi.org/10.1177/1078390318820668

Seo, J. W., Kang, M. R., & Je, N. J. (2019). A study on the factors influencing burnout of psychiatric ward nurses-violence experience, violence coping, social support. *Journal of The Korea Academia-Industrial Cooperation Society,* 20(7), 393-405.

Sim, I. O., Ahn, K. M., & Hwang, E. J. (2020). Experiences of psychiatric nurses who care for patients with physical and psychological violence: A phenomenological study. *International Journal of Environmental Research and Public Health,* 17(14), 5159. https://doi.org/10.3390/ijerph17145159

Son, J. A. (2006). *Content Analysis on Acting Out perceived by Psychiatric Nurses*. Master’s thesis. Kangwon National University.

Song, M. J., & Park, W. J. (2015). Effects of violence experience and human rights on burnout of psychiatric nurses in national mental hospitals. *Korean Journal of Scientific Criminal Investigation,* 9(2), 97-106.

Staggs, V. S. (2015a). Injurious assault rates on inpatient psychiatric units: Associations with staffing by registered nurses and other nursing personnel. *Psychiatric Services*, 66(11), 1162-1166. https://doi.org/10.1176/appi.ps.201400453

Staggs, V. S. (2015b). Trends, victims, and injuries in injurious patient assaults on adult, geriatric, and child/adolescent psychiatric units in US hospitals, 2007–2013. *Research in Nursing & Health*, 38(2), 115-120. https://doi.org/10.1002/nur.21647

Staggs, V. S. (2016). Deviations in monthly staffing and injurious assaults against staff and patients on psychiatric units. *Research in Nursing & Health*, 39(5), 347-352. https://doi.org/10.1002/nur.21735

Stevenson, K. N., Jack, S. M., O’Mara, L., & LeGris, J. (2015). Registered nurses’ experiences of patient violence on acute care psychiatric inpatient units: An interpretive descriptive study. *BMC Nursing*, 14(1), 35. https://doi.org/10.1186/s12912-015-0079-5

Stewart, D., & Bowers, L. (2013). Inpatient verbal aggression: Content, targets and patient characteristics. *Journal of Psychiatric and Mental Health Nursing*, 20(3), 236-243. https://doi.org/10.1111/j.1365-2850.2012.01905.x

Vaaler, A. E., Iversen, V. C., Morken, G., Fløvig, J. C., Palmstierna, T., & Linaker, O. M. (2011). Short-term prediction of threatening and violent behaviour in an acute psychiatric intensive care unit based on patient and environment characteristics. *BMC Psychiatry*, 11(1), 1-7. https://doi.org/10.1186/1471-244x-11-44

Van Wijk, E., Traut, A., & Julie, H. (2014). Environmental and nursing-staff factors contributing to aggressive and violent behaviour of patients in mental health facilities. *Curationis*, 37(1), 1-9. https://doi.org/10.4102/curationis.v37i1.1122

Virtanen, M., Vahtera, J., Batty, G. D., Tuisku, K., Pentti, J., Oksanen, T., Salo, P., Ahola, K., & Kivimäki, M. (2011). Overcrowding in psychiatric wards and physical assaults on staff: Data-linked longitudinal study. *The British Journal of Psychiatry*, 198(2), 149-155. https://doi.org/10.1192/bjp.bp.110.082388

Ward, L. (2013). Ready, aim fire! mental health nurses under siege in acute inpatient facilities. *Issues in Mental Health Nursing*, 34(4), 281-287. https://doi.org/10.3109/01612840.2012.742603

Whittington, R., & Wykes, T. (1992). Staff strain and social support in a psychiatric hospital following assault by a patient. *Journal of Advanced Nursing*, 17(4), 480-486. https://doi.org/10.1111/j.1365-2648.1992.tb01933.x

Woods, P., Ashley, C., Kayto, D., & Heusdens, C. (2008). Piloting violence and incident reporting measures on one acute mental health inpatient unit. *Issues in Mental Health Nursing*, 29(5), 455-469. https://doi.org/10.1080/01612840801981207

Wynn, R., & Bratlid, T. (1998). Staff's experiences with patients' assaults in a Norwegian psychiatric university hospital: A pilot study. *Scandinavian Journal of Caring Sciences*, 12(2), 89-93. https://doi.org/10.1111/j.1471-6712.1998.tb00481.x

Yalcin, S., & Bilgin, H. (2019). Risk predictions of physical aggression in acute psychiatric wards: Findings of a prospective study. *Nursing & health sciences*, 21(3), 316-322. https://doi.org/10.1111/nhs.12599

Yang, C. I., Hsieh, W. P., Lee, L. H., & Chen, S. L. (2016). Assault experiences: Lessons learned from mental health nurses in Taiwan. *International Journal of Mental Health Nursing*, 25(3), 225-233. https://doi.org/10.1111/inm.12203

Yao, X., Li, Z., Arthur, D., Hu, L., & Cheng, G. (2012). The application of a violence risk assessment tool among Chinese psychiatric service users: A preliminary study. *Journal of Psychiatric and Mental Health Nursing*, 19(5), 438-445. https://doi.org/10.1111/j.1365-2850.2011.01821.x

Yao, X., Li, Z., Arthur, D., Hu, L., An, F. R., & Cheng, G. (2014). Acceptability and psychometric properties of Brøset Violence Checklist in psychiatric care settings in China. *Journal of Psychiatric and Mental Health Nursing*, 21(9), 848-855. https://doi.org/10.1111/jpm.12132

Yu, H. M. (2010). *Response of Nurse and Intention for Job Movement regarding Violence fo the Mental Disorder Patients.* Master's thesis. Catholic University.

Yusuf, F., Hendriks, M. M., Eng, T. S., Kandasamy, R., Kim, R. H. S., Selvarani, S., & Huang, P. H. (2006). The impact of verbal abuse on staff working in the psychiatric wards. *Singapore Nursing Journal*, 33(3), 31-36.

Zaczyk, I., Młocek, M., Wilczek-Rużyczka, E., & Kwak, M. (2018). Patient aggression on inpatient psychiatric wards and professional burnout among nurses. *Polish Nursing/Pielegniarstwo Polskie,* 70(4), 339-345.

Zuzelo, P. R., Curran, S. S., & Zeserman, M. A. (2012). Registered nurses’ and behavior health associates’ response to violent inpatient interactions on behavioral health units. *Journal of the American Psychiatric Nurses Association,* 18(2), 112-126. https://doi.org/10.1177/1078390312438553
