# Supplementary material for: Patient Violence towards Mental Health Nurses: A Concept Analysis
Source: Hindawi journal article supplement (doi:10.1155/2023/9496021), 2023-01-01
Supplement: f1 [file 9496021.f1.zip › Appendix 2.docx]

Appendix 2. Summary of the analysed literature

| First author (Year) | Design | Operational definition | Attributes | Antecedents | Consequences | Empirical referents | Type of violence |
| --- | --- | --- | --- | --- | --- | --- | --- |
| Abderhalden (2004) | Quantitative | N/A | N/A | Predictable (internal) factors | N/A | BVC, medical records, SOAS-R | Physical/verbal violence |
| Alexander (2004) | Review | N/A | Multifactorial | Predictable (internal, external, and situational) factors | N/A | Previous literature | N/A |
| Alford-Jenkins (2014) | Quantitative | Aggression was defined as any threatening verbal or physical behaviour directed toward objects or people and risks for aggression is defined as irritability, impulsivity, unwillingness to follow directions, sensitivity to perceived provocation, easily angered when requests are denied, negative attitudes, and verbal threats. | Multifactorial | Predictable (internal) factors | N/A | DASA-IV (Ogloff & Daffern, 2006) | Physical/verbal violence |
| Amoo (2010) | Quantitative | N/A | Multifactorial | Predictable (internal) / unpredictable factors | N/A | Crisis intervention questionnaire (Gerson & Bassuk, 1980) | Physical/verbal violence |
| Aquilina (1991) | Review | N/A | Multifactorial | Predictable (internal, external, and situational) factors | Physical injuries | Previous literature, the injury scale (Fottrell, 1980) | Physical/verbal violence |
| Arango (1999) | Quantitative | N/A | Multifactorial | Predictable (internal and situational) factors | N/A | OAS (Yudofsky et al., 1986) | Physical/verbal violence |
| Arbach-Lucioni (2011) | Quantitative | Violence was operationally defined as any incident of physical violence/aggression towards another person or property ranging from slamming doors angrily or smashing windows to making menacing gestures or punching or kicking another person. | Multifactorial | Predictable (internal) factors | N/A | MOAS (Kay et al., 1988) | Physical/verbal violence |
| Baby (2014) | Qualitative | N/A | Common and frequent, multifactorial, vulnerability of nurses to violence | Predictable (internal, external, and situational) factors | Psychological responses, social cost, needing support | Interview | Physical/verbal violence, sexual harassment |
| Beauford (1997) | Quantitative | N/A | Common and frequent | Predictable (internal) factors | N/A | OAS (Yudofsky et al., 1986) | Physical/verbal violence |
| Bekelepi (2015) | Qualitative | Aggression was any verbal behaviour that comprises insulting, threatening or disruptive behaviour or physical behaviour, and that such assault by psychiatric patients is directed towards self or others. | Common and frequent, multifactorial | Predictable (internal, external, situational) factors | N/A | A questionnaire developed by the author | Physical/verbal violence |
| Bimenyimana (2009) | Qualitative | (1) Violence was any act, word, even attitudes, such as an intimidating facial expression, that creates fear or negative feelings, leading to or resulting in physical or psycho-social unwanted results; (2) aggression was any behaviour, gesture, verbal or non-verbal communication, with the intention to provoke a negative feeling or negative reaction in another person. | Multifactorial | Predictable (internal and external) factors | Psychological responses, needing support | Interview | Physical/verbal/emotional violence |
| Björkdahl (2006) | Quantitative | N/A | Multifactorial | Predictable (internal, external, situational) factors | N/A | BVC (Almvik et al., 2000), SOAS-R (Nijman 1999) | Physical/verbal violence |
| Bonner (2012) | Qualitative | N/A | Multifactorial,  vulnerability of nurses to violence | Predictable (internal)/unpredictable factors | Psychological responses,  needing support | Interview | Physical/verbal violence |
| Bowers (2009) | Quantitative | N/A | Multifactorial | Predictable (internal, external, and situational) factors | N/A | PCC (Bowers et al., 2005), OAS (Yudofsky et al., 1986) | Physical/verbal violence |
| Camuccio (2012) | Qualitative | N/A | Multifactorial | Predictable (internal)/unpredictable factors | Psychological responses, needing support | Interview | Physical violence |
| Chen (2005) | Quantitative | Patients’ aggressive behaviour was defined as any form of threatened behaviour, including verbal or physical acts, to cause harm to a person or damage to an object. | Common and frequent,  multifactorial,  vulnerability of nurses to violence | Predictable (internal) factors | Psychological responses | A questionnaire developed by the author | Physical/verbal violence |
| Chen (2007) | Qualitative | N/A | Common and frequent,  vulnerability of nurses to violence | Predictable (external and situational)/unpredictable factors | Physical injuries, psychological responses,  needing support | Interviews | Physical violence, sexual harassment |
| Chen (2009a) | Quantitative | (1) Verbal violence was a behaviour that humiliates, degrades, or otherwise a lack of respect for the dignity and worth of an individual; (2) bullying/mobbing was offensive behaviour repeated over time; (3) sexual harassment was any unwanted, unreciprocated and unwelcome behaviour of a sexual nature that is offensive to person involved, and causes that person to feel threatened, humiliated or embarrassed; (4) racial harassment was any threatening conduct that is based on race, colour, language, religion, or minority status. | Common and frequent,  vulnerability of nurses to violence | N/A | Psychological responses | The questionnaire (Martino, 2002) | Physical/verbal violence, bullying/mobbing, sexual/racial harassment |
| Chen (2009b) | Quantitative | N/A | N/A | Predictable (situational) factors | N/A | The questionnaire (Martino, 2002) | Physical/verbal violence, bullying/mobbing, sexual/racial harassment |
| Chou (2002) | Quantitative | N/A | Multifactorial | Predictable (internal, external, and situational) factors | N/A | OAS (Yudofsky et al., 1986), SOAS (Palmstierna & Wistedt, 1987) | Physical/verbal violence |
| Clarke (2010) | Quantitative | N/A | Multifactorial | Predictable (internal) factors | Physical injuries | BVC (Almvik et al., 2000) | Physical/verbal violence |
| Cookson (2012) | Quantitative | N/A | Common and frequent,  multifactorial | Predictable (internal and situational)/unpredictable factors | N/A | OAS (Yudofsky et al., 1986) | Physical/verbal violence |
| Currid (2009) | Qualitative | N/A | Common and frequent,  vulnerability of nurses to violence | Predictable (situational) factors | Psychological responses | Interview | N/A |
| Cutcliffe (1999) | Qualitative | N/A | Multifactorial | Predictable (situational) factors | Psychological responses | Interview | N/A |
| Cutcliffe (2013) | Review | N/A | Common and frequent, multifactorial | Predictable (internal, external, and situational) factors | Psychological responses,  needing support | Previous literature | N/A |
| de Bles (2020) | Quantitative | (1) Verbal aggression was yelling, shouting, using obscenities or swearwords, sexual remarks, and threatening others (with or without a threatening posture); (2) physical aggression towards an object was kicking, hitting, throwing objects, and slamming doors; (3) physical aggression towards others was a physical assault on another person by means of hitting, pushing, pulling, holding, scratching, kicking, biting, spitting, touching inappropriately, strangulating, and/or attacking someone with an object. | Common and frequent | Predictable (external) factors | Social cost | OAS (Yudofsky et al., 1986) | Physical/verbal violence (including sexual harassment) |
| d'Ettorre (2017) | Review | N/A | Common and frequent | Predictable (internal, external, and situational) factors | Physical injuries psychological responses | Previous literature | Physical/verbal violence |
| Dong (2020) | Quantitative | N/A | Causes psychological responses | Predictable (situational) factors | Psychological responses | The questionnaire of type and frequency of violence (Yun, 2004) | Physical/verbal violence |
| Drori (2017) | Quantitative | N/A | Common and frequent,  vulnerability of nurses to violence | Predictable (internal and external) factors | Physical injuries, needing support | Medical records | Physical/verbal violence, sexual harassment |
| Dumais (2012) | Quantitative | N/A | N/A | Predictable (internal) factors | N/A | DASA-IV (Ogloff & Daffern, 2006) | Physical/verbal violence |
| Duxbury (1999) | Qualitative | N/A | Common and frequent, vulnerability of nurses to violence | Predictable (internal) factors | N/A | Survey | Physical/verbal violence |
| Duxbury (2002) | Mixed method | N/A | Common and frequent,  multifactorial | Predictable (internal, external, and situational) /unpredictable factors | N/A | OAS (Yudofsky et al., 1986), SOAS (Palmstierna & Wistedt, 1987), MAVAS (Duxbury, 2003), interview | Physical/verbal violence |
| Duxbury (2005) | Mixed method | N/A | Common and frequent,  multifactorial | Predictable (internal, external, and situational)/unpredictable factors | N/A | MAVAS (Duxbury, 2003), interview | N/A |
| Ezeobele (2019) | Quantitative | N/A | Common and frequent,  multifactorial | Predictable (situational) factors | N/A | MAVAS (Duxbury, 2003) | Physical/verbal violence |
| Finnema (1994) | Qualitative | (1) Passive aggression was threatening with aggressive behaviour; (2) active aggression was acting aggressively by actually carrying out the threats; (3) pure aggression was deliberate physical violence. | Common and frequent | Predictable (internal, external, and situational) factors | N/A | Interview | Passive/active/pure aggression |
| Foster (2007) | Quantitative | Aggression was defined as any verbal, non-verbal or physical behaviour that was threatening to the self, others or property, or physical behaviour that actually harmed self, others of property. | Multifactorial | Predictable (external and situational)/unpredictable factors | Physical injuries, psychological responses | SOAS-R (Nijman, 1999) | Physical/verbal violence |
| Giarelli (2018) | Qualitative | Aggression/violence was defined as an assault, physical or verbal initiated by a patient against property, self,  other patients, or staff. | Multifactorial | Predictable (internal and external) factors | N/A | Medical records | Physical/verbal violence |
| Griffith (2013) | Quantitative | N/A | Multifactorial | N/A | N/A | DASA-IV (Ogloff & Daffern, 2006), medical records | Physical/verbal violence |
| Ha (2020) | Quantitative | N/A | Common and frequent | Predictable (situational) factors | Psychological responses | The questionnaire of type and frequency of violence (Yun, 2004) | Physical/verbal violence |
| Hage (2009) | Review | N/A | Multifactorial | Predictable (internal, external, and situational) factors | N/A | Previous literature | Physical/verbal violence |
| Haim (2002) | Quantitative | N/A | Multifactorial | Predictable (internal) factors | N/A | Observation | Physical/verbal violence |
| Haller (1988) | Review | Assaults refer to all violent, personal attacks, either physical or verbal. | Multifactorial | Predictable (internal and external) factors | Physical injuries | Previous literature | Physical/verbal violence |
| Hamrin (2009) | Review | N/A | Multifactorial | Predictable (internal, external, and situational) factors | Physical injuries psychological responses, needing support | Previous literature | Physical/verbal violence, sexual harassment |
| Hansen (1996) | Review | N/A | Multifactorial, vulnerability of nurses to violence | Predictable (internal, external, and situational) factors | Physical injuries, psychological responses | Previous literature | Physical/verbal/emotional violence, sexual harassment |
| Higgins (2009) | Qualitative | Sexual harassment was unwanted or offensive sexual attention, sexual coercion, gender harassment perceived by the nurse. | Vulnerability of nurses to violence | Predictable (internal) factors | Psychological responses | interview | Sexual harassment |
| Isaiah (2019) | Quantitative | N/A | Common and frequent | Predictable (situational) factors | N/A | ATAS (Al-Awawdeh, 2014) | N/A |
| Iverson (2000) | Review | N/A | Multifactorial | Predictable (internal and external) factors | N/A | Previous literature | Physical/verbal violence |
| Jalil (2017) | Quantitative | N/A | N/A | N/A | Psychological responses | Novaco anger scale-provocation inventory (Novaco, 2003), PANAS X (Watson & Clark, 1999), POPAS (Oud, 2000) | Physical/verbal/emotional violence, sexual harassment |
| James (1990) | N/A | Violence was defined as any act of actual physical aggression involving physical contact, irrespective of outcome. | Multifactorial | Predictable (internal and external) factors | N/A | Medical records | Physical violence |
| Jang (2004) | Quantitative | N/A | Common and frequent | N/A | Physical injuries,  psychological responses | The questionnaire of frequency of violent incidents (Jang, 2004) | Physical/verbal/emotional violence |
| Johnson (2004) | Review | N/A | Multifactorial | Predictable (internal, external, and situational)/unpredictable factors | N/A | Previous literature | Physical/verbal violence |
| Jonker (2008) | Quantitative | (1) Non-threatening verbal aggression was defined as shouting, cursing, yelling, not being perceived as a clear threat; (2) threatening verbal aggression was define as making clear verbal threats of violence, perceived as frightening and threatening with emotional distress as a result; (3) humiliating was defined as expressing clear personal insults, abusive cursing, name calling, making discriminating remarks/gestures or spitting, all of which is perceived as making an impression and bringing down pride and self-esteem; (4) provocative aggressive behaviour was defined as if someone has the intention to fasten a quarrel upon others in order to bring forth a social negative response; (5) passive aggressive behaviour was defined as irritant, annoying, resistive and counteractive behaviour, without at one moment being openly aggressive; (6) aggressive splitting behaviour was defined as behaviour that divides a group in two opposite poles; (7) threatening physical aggression was defined as behaviour that is perceived as threatening; (8) destructive aggressive behaviour defined as behaviour that causes damage; physical violence defined as behaviour that will harm or cause injury; (9) violence against self was defined as mutilating behaviour against oneself, with minor or serious injury as a result; (10) sexual intimidation/harassment was defined as a behaviour ranging from making obscene gestures to threatening with assault or rape. | Common and frequent,  vulnerability of nurses to violence | Predictable (situational) factors | N/A | ATAS (Al-Awawdeh, 2014), POPAS (Oud, 2000) | Physical/verbal/emotional violence, sexual harassment |
| Jung (2005) | Qualitative | N/A | Multifactorial, vulnerability of nurses to violence | Predictable (internal and situational)/unpredictable factors | Psychological responses | Interview | Physical/verbal violence |
| Kim (2019a) | Quantitative | N/A | N/A | Predictable (situational) factors | Physical injuries, psychological responses | The questionnaire of type and frequency of violence (Yun, 2004) | Physical/verbal violence |
| Kim (2019b) | Quantitative | N/A | N/A | Predictable (situational) factors | Psychological responses | The questionnaire of type and frequency of violence (Yun, 2004) | Physical/verbal violence |
| Koen (2004) | Quantitative | A lifetime his­tory of physical violence against self, others or objects as reported by the patient or family or previously recorded in clinical notes, or significant verbal threats as reported by family or observed during interviews conducted on the day of admission. | N/A | Predictable (internal) factors | N/A | NOSIE (Honigfeld et al. 1991), OAS (Yudofsky et al., 1986) | Physical/verbal violence |
| Koukia (2013) | Qualitative | N/A | Common and frequent | Predictable (situational) factors | Psychological responses | Observation, survey | Physical/verbal violence |
| Langsrud (2007) | Quantitative | N/A | Multifactorial | Predictable (internal and situational) factors | Physical injuries | Medical records, SOAS | N/A |
| LePage (2005) | Quantitative | N/A | N/A | Predictable (internal) factors | Physical injuries | Medical records | N/A |
| Lim (2019) | Qualitative | N/A | Multifactorial | Predictable (internal, external, and situational) /unpredictable factors | Needing support | Interview | N/A |
| Llor-Esteban (2017) | Quantitative | (1) Non-physical violence was included the behaviour that users get angry with nurses/raise their voice/insult/threaten to attack/give nurses dirty or contemptuous looks/address nurses defiantly or they make violent gestures at nurses; (2) physical violence was included the behaviour that users show their anger at nurses by banging things, slamming doors, furniture, etc/have even shoved nurses, shaken nurses, or spit at nurses/show their anger at nurses by wrecking doors, walls, breaking windows, etc. | Common and frequent | Predictable (internal and situational) factors | Physical injuries,  Psychological responses | HABS-U (Waschgler et al., 2012) | Physical/verbal violence |
| Lynch (2010) | Quantitative | (1) Altercation by the aggressor was an escalation of noisy, heated, angry, and threatening behaviour aimed at another person or persons; (2) aggression was an intentional forceful goal-directed actions; (3) assault by the aggressor was a threat or use of force on another person or property; (4) violence included aggression, altercation, assault, and self-harm. | Multifactorial | Predictable (internal, external, and situational) factors | N/A | OAS (Yudofsky et al., 1986), ROVA (Lynch & Noel, 2010) | Physical/verbal/emotional violence |
| Maneeton (2019) | Quantitative | N/A | Multifactorial | Predictable (internal)/unpredictable factors | N/A | Medical records | Physical/verbal violence |
| Margari (2005) | Quantitative | N/A | Multifactorial | Predictable (internal) factors | N/A | MOAS (Kay et al., 1988), NOSIE (Honigfeld et al., 1991) | Physical/verbal violence |
| Moghadam (2013) | Qualitative | N/A | Multifactorial | Predictable (internal, external, and situational) factors | Physical injuries, psychological responses | Interview | N/A |
| Morrison (1989) | Quantitative | N/A | Multifactorial | Predictable (internal, external, and situational) factors | N/A | VS (Morrison, 1993) | Physical/verbal violence |
| Morrison (1993a) | Quantitative | N/A | Multifactorial | Predictable (internal) factors | N/A | VS (Morrison, 1993) | Physical/verbal violence |
| Morrison (1993b) | Review | N/A | Multifactorial | Predictable (external and situational) factors | N/A | Previous literature | N/A |
| Moursel (2019) | Quantitative | N/A | Multifactorial | Predictable (internal) factors | N/A | BVC (Almvik et al., 2000), OAS (Yudofsky et al., 1986) | Physical/verbal violence |
| Moylan (2014) | Mixed method | N/A | Common and frequent, vulnerability of nurses to violence | Predictable (situational) factors | Physical injuries, psychological responses | MAPAT (Moylan, 2009) | N/A |
| Owen (1998) | Quantitative | (1) Aggression was defined as any threatening verbal or physical behaviour directed toward self or others; (2) violence was defined as any physical behaviour that resulted in harm to self or others. | Common and frequent, multifactorial | Predictable (internal, external, and situational) factors | Physical njuries | A questionnaire developed by the author | Physical/verbal violence |
| Oyelade (2018) | Qualitative | N/A | Multifactorial,  vulnerability of nurses to violence | Predictable (external and situational) factors | Physical injuries, psychological responses,  needing support | Interview | Physical violence, sexual harassment |
| Pekurinen (2017) | Quantitative | N/A | Common and frequent | N/A | Psychological responses | The questionnaire (Virtanen et al., 2011) | Physical/verbal violence |
| Penningroth (1975) | Review | (1) Acting out was any behaviour short of violence, including verbal aggression and threats; (2) violence was any self- or other-destructive physical behaviour or any physical behaviour that is destructive of property. | Common and frequent,  multifactorial | Predictable (internal and external) factors | Physical injuries | Previous literature | Physical/verbal violence |
| Pulsford (2013) | Qualitative | N/A | Multifactorial | Predictable (internal, external, and situational) factors | N/A | MAVAS (Duxbury, 2003) | Physical violence, sexual harassment |
| Ruiz-Hernández (2019) | Mixed method | N/A | Common and frequent,  multifactorial | Predictable (internal, external, and situational) factors | Psychological responses | HABS-U (Waschgler et al., 2012), interview | Physical/verbal/emotional violence,  sexual harassment |
| Salerno (2009) | Quantitative | N/A | Multifactorial | Predictable (internal, external, and situational) factors | N/A | Medical records | Physical/verbal violence |
| Salzmann-Erikson (2020) | Review | N/A | Multifactorial | Predictable (internal, external, and situational)/unpredictable factors | N/A | Previous literature | Physical/verbal violence |
| Sarver (2019) | Quantitative | Violence referred to acts of aggression on others as these often result in assaults to staff, isolation through time outs, or seclusion. | Multifactorial | Predictable (internal, external, and situational) factors | N/A | BVC (Almvik et al., 2000), Medical records, SOAS (Palmstierna & Wistedt, 1987) | Physical/verbal violence, sexual harassment |
| Seo (2019) | Quantitative | N/A | Common and frequent | N/A | Assault responses | The questionnaire of type and frequency of violence (Yun, 2004) | Physical/verbal violence |
| Sim (2020) | Qualitative | N/A | Multifactorial, vulnerability of nurses to violence | Predictable (external)/unpredictable factors | Injuries, psychological responses, needing support | Interview | N/A |
| Son (2006) | Qualitative | N/A | Multifactorial | Predictable (internal and external) factors | N/A | Interview | Physical/verbal violence |
| Song (2015) | Quantitative | N/A | Multifactorial | Predictable (internal, external, and situational) factors | Psychological responses | The questionnaire of type and frequency of violence (Yun, 2004) | Physical/verbal violence |
| Staggs (2015a) | Quantitative | (1) Patient assaults against patients were defined as assaults in which only other patients (no visitors or hospital personnel) were injured; (2) patient assaults against staff were defined as assaults in which only hospital personnel (no visitors or patients) were injured. | Multifactorial | Predictable (internal and external) factors | Death, injuries | Medical records | Physical/verbal violence, sexual harassment |
| Staggs (2015b) | Quantitative | N/A | Common and frequent | Predictable (external) factors | Injuries | Medical records | Physical violence |
| Staggs (2016) | Quantitative | (1) Assaults against staff was defined as injurious assaults in which only hospital personnel were reported as injured; (2) assaults against patients were defined as injurious assaults in which only one or more patients were reported as injured. | Common and frequent, multifactorial | Predictable (internal and external) factors | Injuries | Medical records | Physical violence |
| Stevenson (2015) | Qualitative | Violence included that most threatening or dangerous to nurses' personal well-being. | Vulnerability of nurses to violence | Predictable (internal and situational) factors | Injuries, psychological responses, needing support | interview | Physical/verbal violence |
| Stewart (2013) | Quantitative | (1) Verbal aggression was defined as making loud noises, screaming angry shouting, personal insults, cursing, foul language, threats, abuse, swearing or arguing; (2) abusive language was defined as swearing, use of foul language, insults, use of sexually inappropriate language or more generic terms such as ‘verbal abuse’ or ‘abusive’; (3) shouting was defined as shouting, screaming, yelling, making loud noises or being noisy; (4) threats was defined as verbal threats of violence, damage to property, against self or other actions; (5) racism was defined as comments with racial content; (6) anger was defined that when the notes mentioned the patient being angry, cross, or in a heated confrontation; (7) unspecified verbal aggression was defined as many entries used terms such as ‘verbal aggression’, ‘hostile’, ‘argumentative’, ‘irritable’ or ‘verbally challenging’ without providing further detail about the specific nature of these events. | Common and frequent | Predictable (internal) factors | N/A | PCC (Bowers et al., 2005) | Verbal violence (including sexual harassment), racial harassment |
| Vaaler (2011) | Quantitative | N/A | Multifactorial | Predictable (internal, external, and situational) factors | N/A | BVC (Almvik et al., 2000), SOAS-R (Nijman, 1999) | Physical/verbal violence |
| Van Wijk (2014) | Qualitative | N/A | Multifactorial | Predictable (internal, external, and situational) factors | N/A | Interview | Physical/verbal violence |
| Virtanen (2011) | Quantitative | N/A | Multifactorial | Predictable (external and situational) factors | N/A | Medical records | Physical violence |
| Ward (2013) | Qualitative | N/A | Vulnerability of nurses to violence | Predictable (internal, external, and situational) factors | Psychological responses | Interview | N/A |
| Whittington (1992) | Qualitative | N/A | Vulnerability of nurses to violence | N/A | Psychological responses, needing support | A questionnaire developed by the author | n/a |
| Woods (2008) | Quantitative | N/A | Multifactorial | Predictable (internal, external, and situational) factors |  | BVC (Almvik et al., 2000), SOAS-R (Nijman, 1999) | Physical/verbal violence |
| Wynn (1998) | Quantitative | Assault was defined as physical violence. | Common and frequent, multifactorial, vulnerability of nurses to violence | Predictable (internal, external, and situational) factors | N/A | A questionnaire developed by the author | Physical violence |
| Yalcin (2019) | Quantitative | N/A | Multifactorial | Predictable (internal, external, and situational) factors | N/A | A questionnaire developed by the author, medical records | Physical/verbal violence |
| Yang (2016) | Qualitative | N/A | Multifactorial, vulnerability of nurses to violence | Predictable (internal)/unpredictable factors | Psychological responses, needing support | Interview | Physical/verbal violence |
| Yao (2012) | Quantitative | N/A | Multifactorial | Predictable (internal and external) factors | Injuries | Medical records, SOAS-R (Nijman, 1999), V-RISK-10 (Bjorkly et al., 2009) | Physical/verbal violence |
| Yao (2014) | Quantitative | N/A | N/A | Predictable (internal) factors | N/A | BVC (Almvik et al., 2000) | Physical/verbal violence |
| Yu (2010) | Quantitative | N/A | N/A | Predictable (situational) factors | Assault responses, injuries | The questionnaire of frequency of violent incidents (Jang, 2004) | Physical/verbal violence (including humiliating behaviour) |
| Yusuf (2006) | Quantitative | N/A | Multifactorial, vulnerability of nurses to violence | Predictable (internal, external, and situational) factors | Psychological responses | A questionnaire developed by the author | Verbal violence |
| Zaczyk (2018) | Quantitative | N/A | Common and frequent | N/A | Injuries, psychological responses | A questionnaire developed by the author | Physical/verbal violence |
| Zuzelo (2012) | Qualitative | Violence was the use of physical force against another person or group, resulting in physical, sexual, or psychological harm. | Multifactorial, vulnerability of nurses to violence | Predictable (internal and situational) factors | Psychological responses, needing support | Interview | Physical/verbal/emotional violence, sexual harassment |

Abbreviation: ATAS, the attitudes towards aggression scale; BVC, the Brøset-violence checklist; DASA-IV, the dynamic appraisal of situational aggression-inpatient version; HABS-U, the healthcare-workers aggressive behaviour scale-users; MAPAT, the Moylan assessment of progressive aggression tool; MAVAS: the management of aggression and violence attitude scale; MOAS, the modified overt aggression scale; NOSIE, the nurse’s observation scale for inpatient evaluation; OAS: the overt aggression scale; PANAS, the positive and negative affect schedule-expanded form; PCC-SR, the patient-staff conflict checklist; POPAS, the prevalence of aggression; ROVA, the risk of violence assessment scale; SOAS, the staff observation aggression scale; SOAS-R, the revised staff observation of aggression scale; V-RISK-10, the violence risk screening-10; VS, the violence scale.
